1 **Testing lags and emerging COVID-19 outbreaks in federal penitentiaries: A view from**  
2 **Canada**

3  
4 Alexandra Blair<sup>1</sup>, Abtin Parnia<sup>1</sup>, Arjumand Siddiqi<sup>1,2</sup>

- 5  
6 1. Dalla Lana School of Public Health, University of Toronto, Toronto Canada.  
7 2. Gillings School of Global Public Health, University of North Carolina-Chapel Hill,  
8 Chapel Hill, USA

9  
10  
11  
12 **ABSTRACT**

13  
14 Objectives: To provide the first known comprehensive analysis of COVID-19 outcomes in a  
15 federal penitentiary system. We examined the following COVID-19 outcomes within federal  
16 penitentiaries in Canada and contrasted them with estimates for the overall population in the  
17 penitentiaries' respective provincial jurisdictions: testing, prevalence, the proportion recovered,  
18 and fatality.

19  
20 Methods: Data for prisons were obtained from the Correctional Service of Canada and, for the  
21 general population, from the Esri COVID-19 Canadian Outbreak Tracking Hub. Data were  
22 retrieved between March 30 and April 21, 2020, and are accurate to this date. Penitentiary-,  
23 province- and sex-specific frequency statistics for each outcome were calculated.

24  
25 Results: Data on 50 of 51 penitentiaries (98%) were available. Of these, 72% of penitentiaries  
26 reported fewer tests per 1000 population than the Canadian general population average (16  
27 tests/1000 population), and 24% of penitentiaries reported zero tests. Penitentiaries with high  
28 levels of testing were those that already had elevated COVID-19 prevalence. Five penitentiaries  
29 reported an outbreak (at least one case). Hardest hit penitentiaries were those in Quebec, Ontario,  
30 and British Columbia, with some prisons reporting COVID-19 prevalence of 30% to 40%. Of  
31 these, two were women's prisons. Female prisoners were over-represented among cases (31% of  
32 cases overall, despite representing 5% of the total prison population).

33  
34 Conclusion: Increased sentinel or universal testing may be appropriate given the confined nature  
35 of prison populations. This, along with rigorous infection prevention control practices and the  
36 potential release of prisoners, will be needed to curb current outbreaks and those likely to come.

37  
38  
39  
40

41

42 **GRAPHICAL SUMMARY**

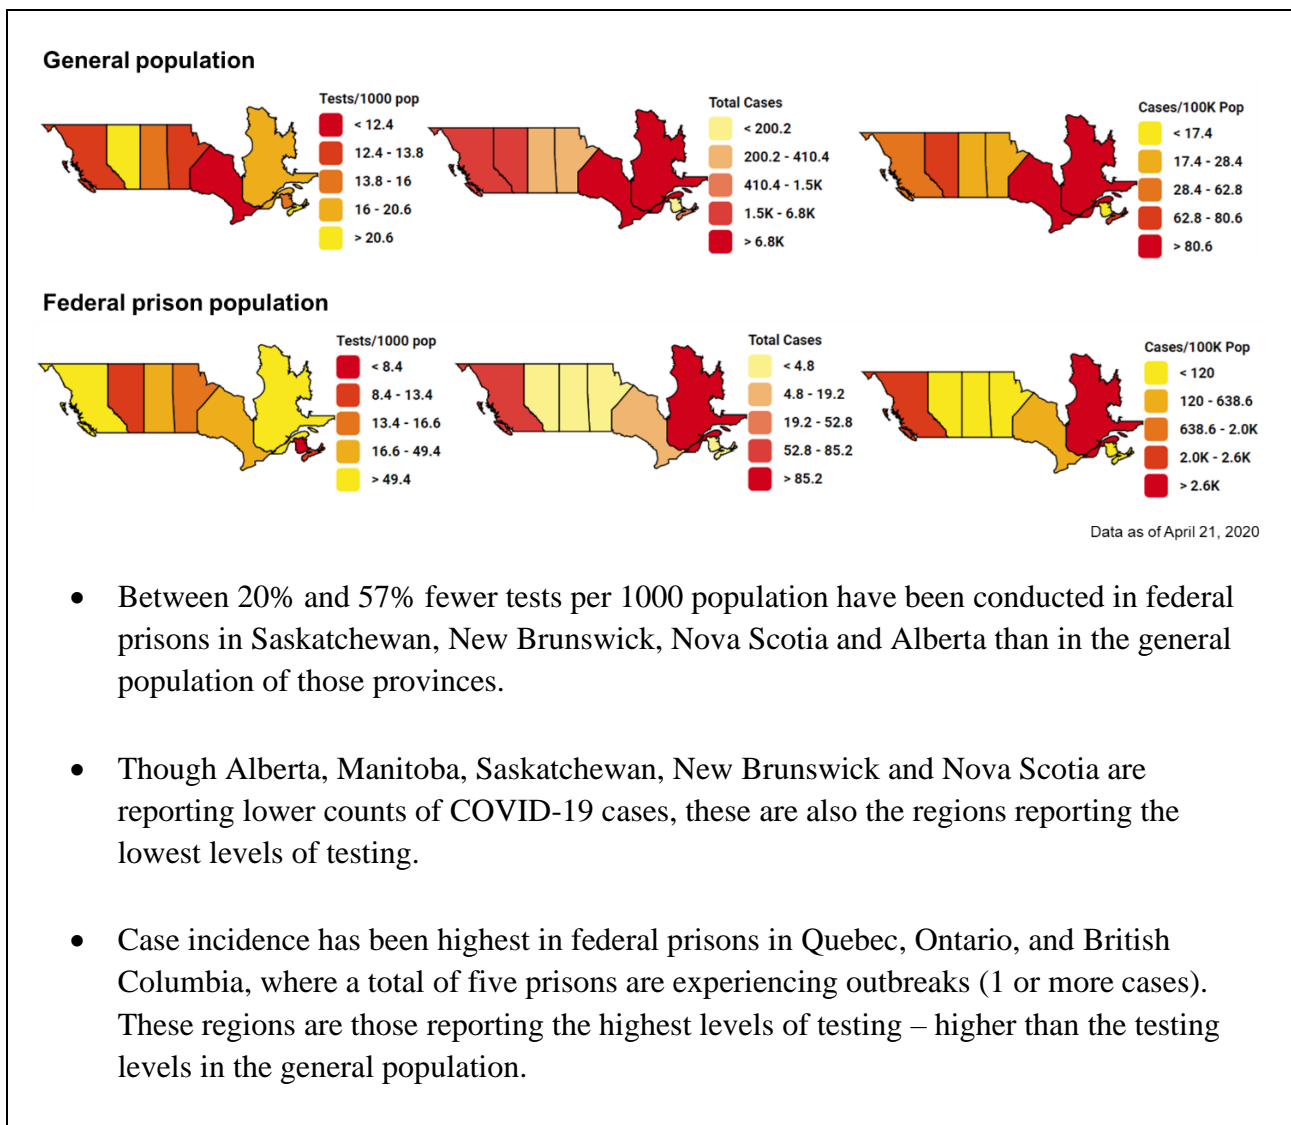

43

44 **Keywords:** Prison; Canada; COVID-19; Health equity

45

46 Number of Figures: 5

47 Number of Supplementary data tables: 7

## 48 **1. BACKGROUND**

49  
50 As we are (re)learning from the evidence of COVID-19 outbreaks in long-term care facilities,  
51 housing large groups of individuals in confined, institutionalized environments is a recipe for  
52 large-scale, human-to-human transmission of infectious disease. Prisons have similar dynamics  
53 of confinement, of residents who are dependent on the institutions' conditions and policies for  
54 basic living and hygiene and, of clinical susceptibility due to underlying health conditions [1-3].  
55 Epidemiologic findings from past outbreaks of respiratory diseases such as influenza,  
56 adenoviruses, and tuberculosis in high-income countries highlight the higher likelihood of  
57 infection transmission and disease incidence within prisons compared to the general population.  
58 [1-3]. Early reports suggest that several penitentiaries in the United States are experiencing  
59 COVID-19 outbreaks [4], though, as far as we know, no comprehensive analysis of these  
60 penitentiaries has yet been conducted, and very little is known about COVID-19 in prison  
61 contexts in other high-income countries. In this study, we use Canadian data to provide the first  
62 known examination of COVID-19 statistics for a federal penitentiary system. In doing so, we  
63 also bring front-and-center a major health equity issue, because Indigenous and racialized  
64 communities are over-represented within the Canadian prison system [5].

65  
66 In the context of the COVID-19 pandemic, there are specific factors that place prisoner  
67 populations at particularly high risk of COVID-19 infection, and of a higher risk for severe  
68 (compared to mild) COVID-19 outcomes. These include housing multiple prisoners to one cell  
69 (“double-bunking”)[6], the ageing population within prisons—particularly in federal prisons[7],  
70 a high prevalence of chronic disease comorbidities and immuno-compromised health status  
71 associated with substance use and blood-borne infections[8], and the regular entrance of  
72 custodial and health care staff from communities with likely community-based transmission.

73  
74 At the time of writing (late April 2020), Canada has been documenting the COVID-19 pandemic  
75 on its soil for almost two months. In late March 2020, the Correctional Service of Canada (CSC),  
76 Canada's federal body responsible for incarcerated individuals serving sentences of at least two  
77 years, had indicated that they had taken steps to prevent and were prepared to respond to  
78 COVID-19 outbreaks inside its federal penitentiaries [9]. With this study, we aim to offer a

79 baseline situational assessment of COVID-19 testing and burden in Canadian federal  
80 penitentiaries, from which future analyses can be based. This study aims to summarize and  
81 compare the prevalence of testing, test positivity, COVID-19 prevalence, case fatality, and the  
82 proportion of cases recovered within federal penitentiaries in Canada, by province and for  
83 Canada overall, and to contrast these with rates in penitentiaries' respective provincial  
84 jurisdictions.

85

## 86 **2. METHOD**

87

### 88 **Data and study population**

89

90 In an unprecedented act of transparency, CSC made COVID-19 testing and case numbers  
91 publicly available for each federal penitentiary on their website. Data up until April 21, 2020,  
92 were used [10]. Equivalent values for the Canadian population were extracted from the COVID-  
93 19 Canada Outbreak Tracker Resource Hub [11]. For each indicator, described below, we  
94 calculated prison-, sex-, and province-specific estimates. Prison population denominators were  
95 approximated by the maximum prison capacity for each penitentiary [12]. For the general  
96 population, denominators (i.e., total general population) were obtained from Statistics Canada  
97 population estimates for the first quarter of 2020 [13].

98

99 Additionally, to provide a timeline for the number of tests and cases in prisons with possible  
100 outbreaks (5 or more cases at the time of analysis), we used the Wayback Machine (archive.org)  
101 to obtain all previous copies of CSC's COVID-19 reporting webpage [10]. The earliest version  
102 of the CSC webpage was created on April 1, 2020, which provided cumulative data up until  
103 March 30, 2020. There were eight additional updates, which reported on data from April 7, 8, 10,  
104 12, 13, 15, 17, and 18, 2020. Cumulative data at each of these dates were merged with the data  
105 from April 21, 2020, to create a time-series ranging from March 30 to April 21, 2020. For  
106 calendar dates at which no CSC updates were made available, we filled in the information with  
107 the data from the previous observation.

108

109 Given that several federal penitentiaries are in fact multiplex sites—either with distinct buildings  
110 or units operating under different security levels (e.g. minimum, medium or maximum) or  
111 offering distinct services (e.g. treatment facilities)—and that sub-population capacities were not  
112 always available for each separate unit, we chose to group several multi-complex facilities in our  
113 analyses. This was the case of Quebec’s Federal Training Center Multi-Level Unit and Minimum  
114 security facility; British Columbia’s Pacific Institution, Pacific Institution Regional Treatment  
115 Center and Pacific Institution Reception Center; Ontario’s Millhaven Institution, Millhaven  
116 Regional Hospital and Millhaven Regional Treatment Center, as well as Collins Bay Minimum  
117 Institution and Collins Bay Regional Treatment Center, and Joyceville Institution and Joyceville  
118 Minimum Institution. With these groupings, we recorded 51 facilities. We were able to analyze  
119 data from 50 of these facilities (98%) (all data in Supplementary File 1).

120

## 121 **Measures**

122

### 123 ***Total tests and cases***

124 The total number of tests performed was obtained directly from the CSC and the Canada  
125 Outbreak Tracker Resource Hub websites. CSC reports on the number of “positive tests”. We  
126 considered all “positive tests” as confirmed cases.

127

### 128 ***Tests per 1000 population***

129 Tests per 1000 population were estimated by dividing the total number of tests performed by the  
130 total population in each facility, in the prisoner population of each province, and the general  
131 population of each province, respectively, and multiplying the fraction by 1000.

132

### 133 ***Test-positive rate***

134 We estimated the proportion of tests that were positive by dividing the total number of positive  
135 tests (confirmed cases) by the total number of tests, in each prison, provincial prison population,  
136 and the provincial general population.

137

### 138 ***Tested COVID-19 prevalence***

139 We estimated the prevalence of COVID-19 as identified through tests in the penitentiary and  
140 provincial populations by dividing the total number of positive tests (confirmed cases) by the  
141 population of each facility, the total prison population by province, and the total provincial  
142 population, respectively. This indicator can also be considered the cumulative incidence  
143 proportion.

144

#### 145 *Proportion recovered*

146 To offer a crude estimate of the evolution of the epidemics inside and outside of prisons, we  
147 estimated the proportion of cases that had recovered. This was done by dividing the number of  
148 cases who had recovered by the total number of positive tests (total confirmed cases).

149 Operational definitions of recovered cases vary across jurisdictions in Canada, and CSC does not  
150 define their measure in their reporting. Recovered cases are those who either received  
151 confirmatory negative test results or for whom 10 to 14 days have elapsed since the start of their  
152 symptoms and they are symptom-free for at least 2 to 3 days [14, 15]. Therefore, we interpret  
153 recovered case numbers with caution.

154

#### 155 *Population categories in prisons with outbreaks: Susceptible, Infected, Recovered and Died*

156 An outbreak of COVID-19 within confined populations, such as long-term care homes, can be  
157 declared after a single resident or staff member is confirmed positive [16]. Thus, we consider  
158 prisons with one or more reported cases of COVID-19 among its prisoner population as those  
159 experiencing outbreaks. To describe the evolution of testing and incidence in prisons with  
160 outbreaks across our study period, we classified each prison's population into four categories, for  
161 each calendar day of the study period. We estimated the number of prisoners who were  
162 "susceptible" to infection by subtracting the total number of confirmed active, recovered, and  
163 deceased cases from the maximum population capacity of each prison. Prisoners considered  
164 "infected" were those with positive tests who had yet to recover or die. Prisoners declared to be  
165 "recovered" were assumed to no longer present active infections or be susceptible to infection.  
166 Lastly, the total number of prisoners who had "died" were those whose death was declared to  
167 result from COVID-19 complications.

168

### 169 **3. RESULTS**

170

### 171 **3.1 Testing inside versus outside federal prisons**

172

173 An analysis of testing within all federal penitentiaries illustrates both the heterogeneity of  
174 COVID-19 testing within prisons in Canada and a low if not a complete absence of testing in  
175 many facilities (Figure 1). Twelve of the 50 facilities studied—nearly one in five (24%)—had  
176 recorded a complete absence of testing (indicated by hollow bars in Figure 1). Approximately  
177 72% of all facilities (36/50) recorded fewer tests than the Canadian general population average of  
178 16 tests per 1000 population. Facilities with higher levels of testing per 1000 population, tended  
179 to be those that had already reported a higher COVID-19 prevalence (Figure 1).

180

181 On average across provinces, New Brunswick, Nova Scotia, Alberta, and Saskatchewan have  
182 been testing less inside prisons than in the general population (Figure 2). The opposite is true for  
183 Quebec, Ontario, and British Columbia, which were likely responsible for driving the average of  
184 34 tests per 1000 population observed for the prison population, overall.

185

### 186 **3.2 Prevalence of COVID-19 inside versus outside federal prisons**

187

188 The high positive test rates and estimated prevalence of COVID-19 in prisons in Quebec and  
189 British Columbia point to emerging outbreaks in these provinces (Figure 2). Prevalence was 10  
190 times higher in Quebec, 6 times higher in British Columbia, and 2 times higher in Ontario within  
191 federal prisons compared to the general population of each province (Figure 2).

192

193 Many of the hardest-hit penitentiaries are near major city centers. In Quebec, this was the  
194 Federal Training Center complex in Laval, just north of Montreal (51 cases, 7% COVID-19  
195 prevalence) and, Joliette Institution for Women in Joliette, a 1-hour drive away from Montreal  
196 (51 cases, 39% prevalence). However, Port Cartier Institution in Côte Nord (a relatively remote  
197 region of the province) also reported 15 cases (Figure 1). In British Columbia, most affected was  
198 the Mission Medium Security Institution, a 1-hour drive away from Vancouver (64 cases, 30%  
199 prevalence) (Figure 1). Ontario's Grand Valley Institution for Women, located in Kitchener (1-  
200 hour drive away from Toronto) also experienced a smaller outbreak of 8 cases (6% prevalence).

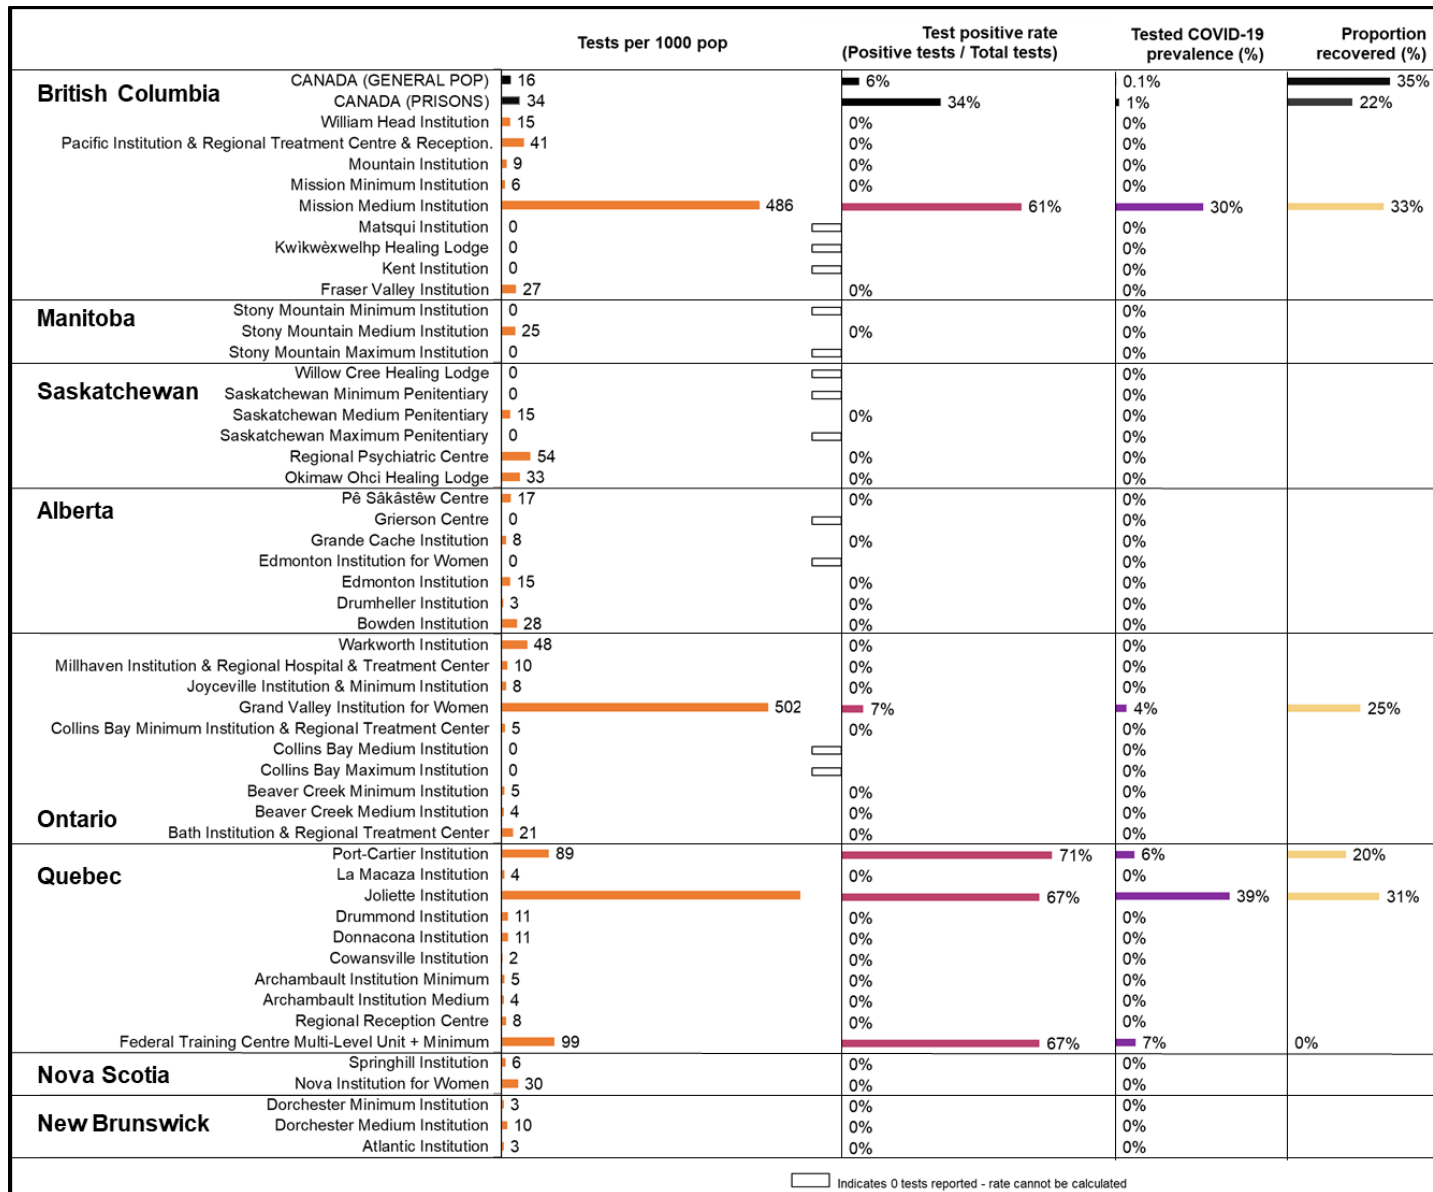

201

202

Figure 1: Test-positive proportion, case prevalence, and testing per 1000 population for all federal penitentiaries.



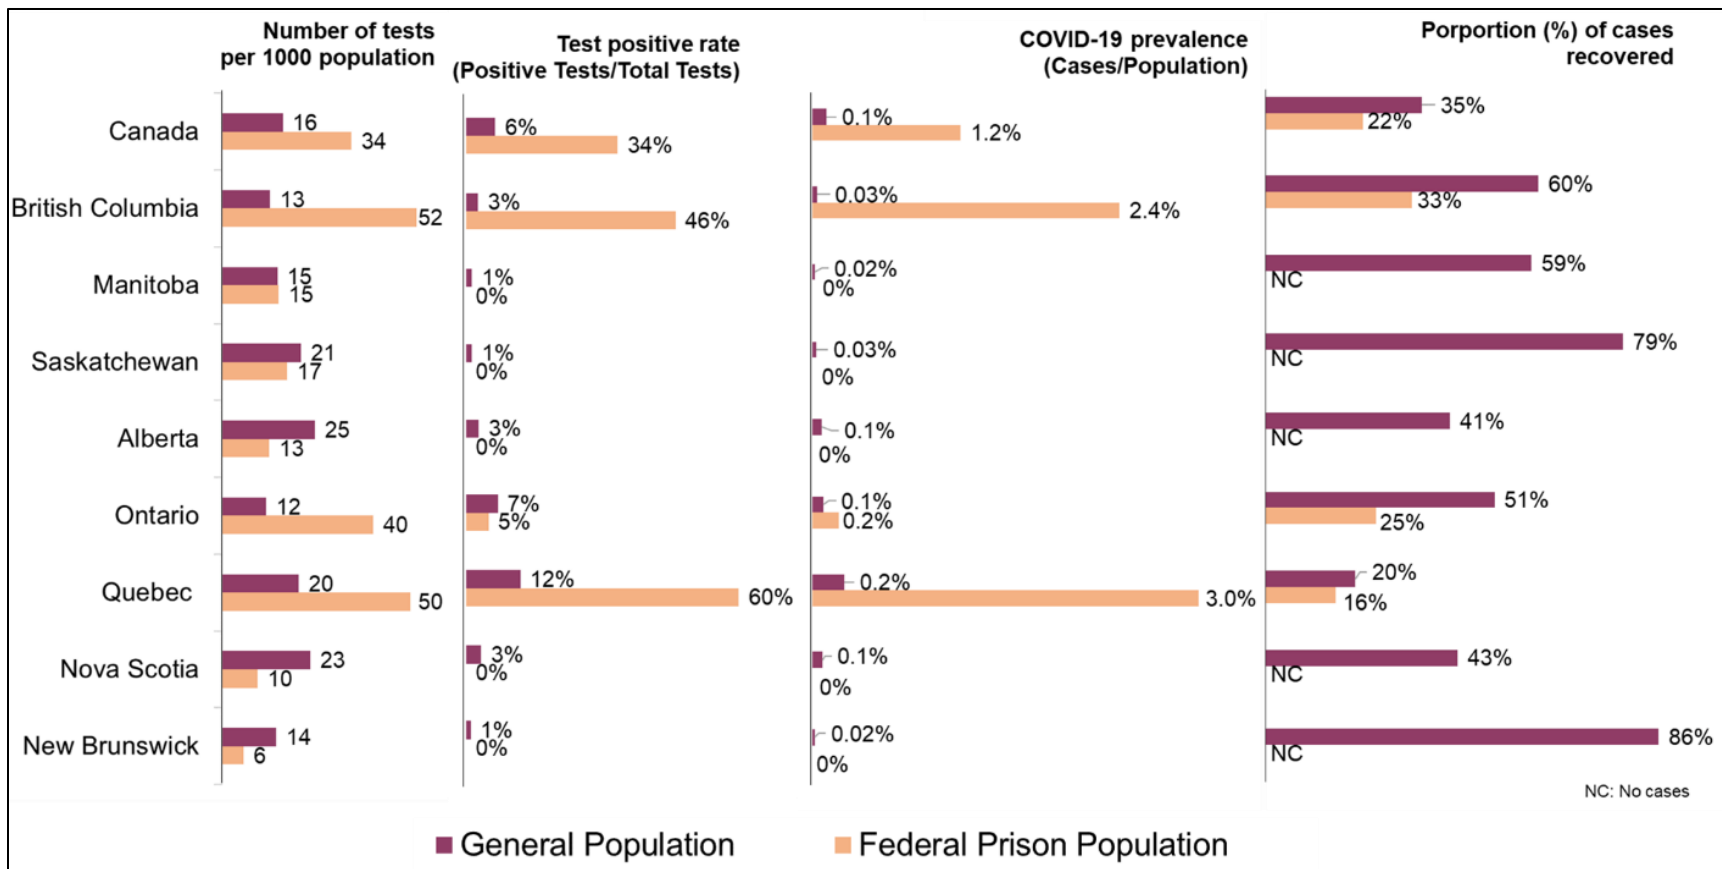

203

204 Figure 2: Testing per 1000 population, test-positive rate, and prevalence of positive tests, for federal prison and general populations, by province and in Canada  
 205 overall

206

207 In the five institutions with one or more cases, we found that testing was largely reactive, with  
208 the onset of concentrated testing efforts occurring after COVID-19 outbreaks had already  
209 established. An exception to this observation was Quebec’s Federal Training Center, which was  
210 the only facility recording negative tests before the observations of positive tests (Figure 3).  
211 Further, though institutions all recorded a gradual increase in the number of tests performed over  
212 time, the high proportion of positive tests throughout the study period suggests that these prisons  
213 likely did not implement more intensive, wide-spread testing throughout the prison populations  
214 once a case was observed. An exception to this, however, was Ontario’s Grand Valley Women’s  
215 Institution, which recorded a significant jump in testing once the first cases were confirmed, with  
216 a majority of tests returning negative since April 7, 2020.

217

### 218 **3.3 Proportion of cases recovered and fatality inside versus outside prisons**

219

220 The proportion of cases that had recovered inside federal penitentiaries ranged from 0% to 33%  
221 (Figure 1). The Susceptible, Infected, and Recovered plots (Figure 4) illustrate what proportion  
222 of prisoners each prison with one or more cases have become infected and have recovered or  
223 died throughout the study period. Of the five prisons with outbreaks, Quebec’s Joliette Women’s  
224 Institution and British Columbia’s Mission Medium Institution have the seen largest proportion  
225 of their population become infected and subsequently recover. Smaller proportions of cases have  
226 recovered in Quebec’s Federal Training Centre and Port-Cartier and Ontario’s Grand Valley  
227 Women’s Institution, and plot results suggest that a large proportion of prisoners remain  
228 susceptible in these institutions (Figure 4).

229

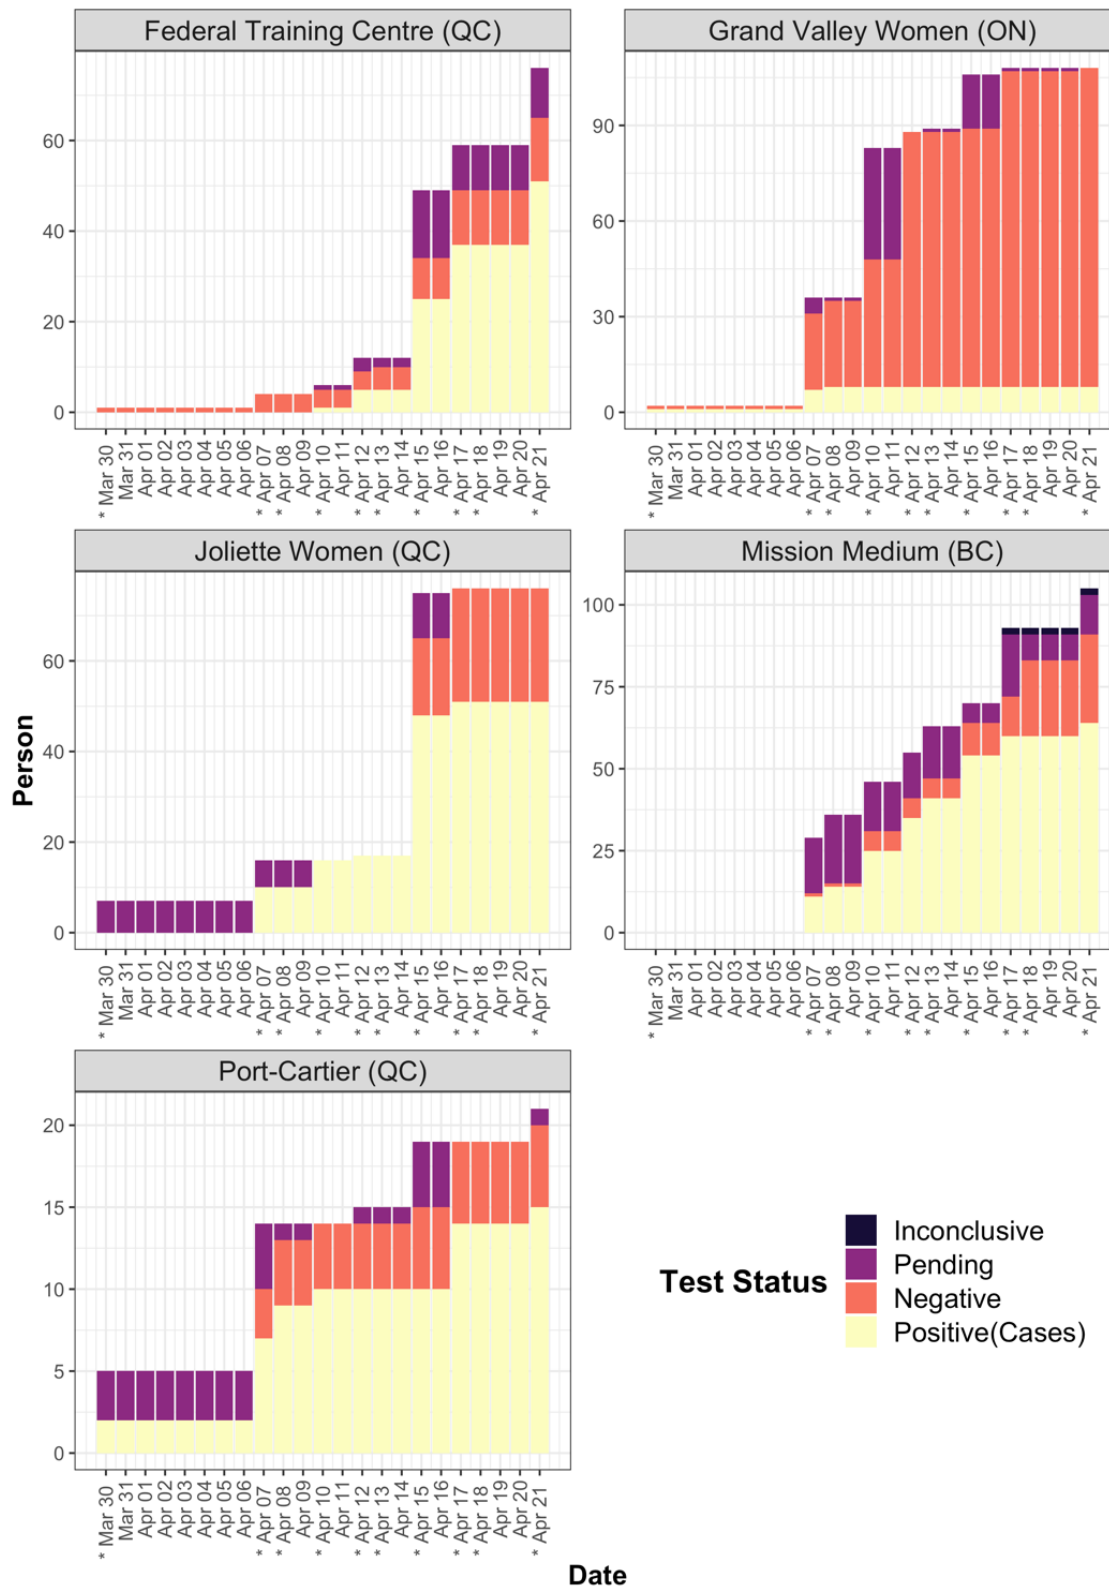

230  
 231 Figure 3: Testing patterns and outcomes between March 30 and April 21, 2020, in five penitentiaries with one or  
 232 more recorded COVID-19 cases. \* Indicated date at which data was reported by Correctional Services Canada.

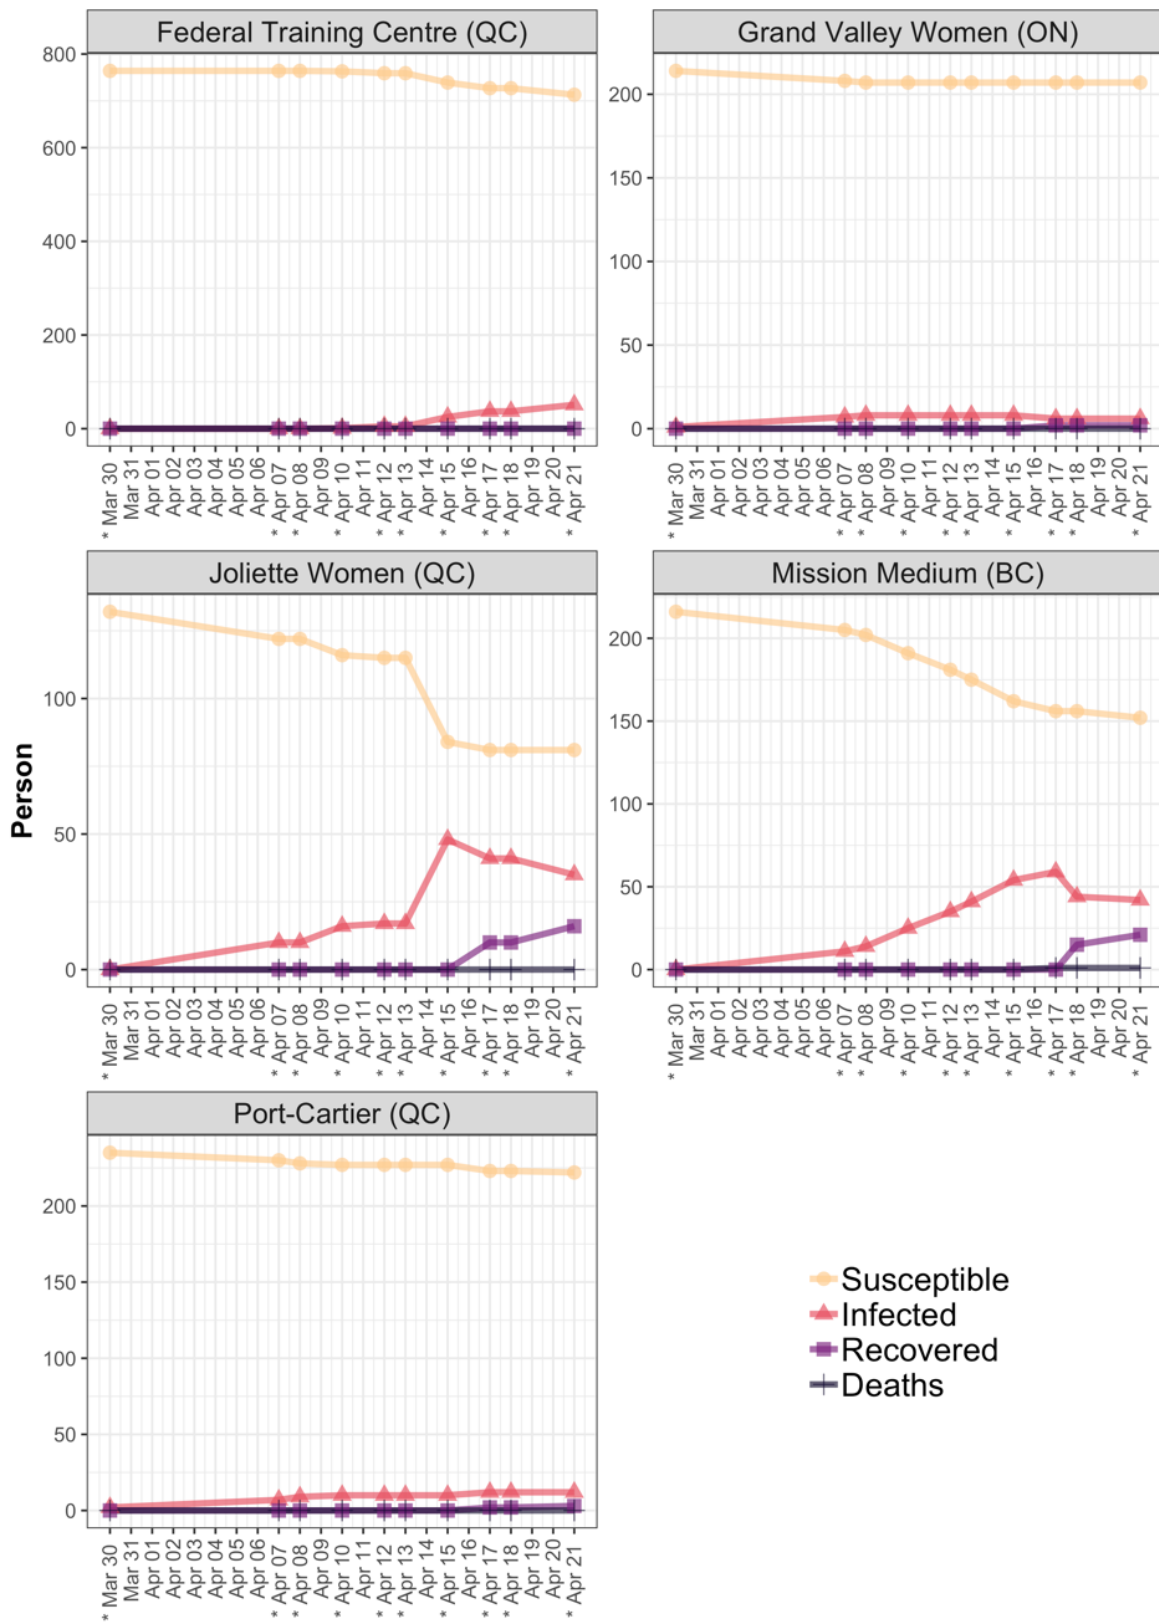

233

234 Figure 4: Number of susceptible, infected, recovered cases and deaths between March 30 and April 21, 2020, in

235 penitentiaries with one or more recorded COVID-19 cases. \* Indicates date at which data was reported by CSC.

236 In contrast to cases in the general population, a smaller proportion of cases in federal  
237 penitentiaries in Quebec, Ontario, and British Columbia had recovered (Figure 2). In both  
238 Ontario and British Columbia, the proportion of individuals who had recovered within prisons  
239 was half that of the proportion of cases recovered in the community. With the available evidence,  
240 it is difficult to know precisely what may be driving these differences in percent recovered inside  
241 versus outside of prisons. One explanation is that outbreaks inside prisons may have started more  
242 recently than those within the general public. Another possibility is that health and sanitary  
243 conditions within prisons may lead to lags in recovery. Further, this cross-sectional summary of  
244 differences must be interpreted with caution, since the proportion of cases that are recovered will  
245 vary according to the number of new incident cases observed in both settings.

246  
247 At the time of data collection, one of the 189 laboratory-confirmed cases across all federal  
248 penitentiaries had died (0.5%), a 67% higher proportion than that observed in the general  
249 population, (0.3%, 1,966 of 614,340 cases). Case fatality estimates should be interpreted with  
250 caution, however, given the likely underestimation of the true number of cases (denominator  
251 value) in both settings.

252

### 253 3.4 Testing, prevalence and proportion recovered by sex

254

255 Among the 50 facilities included in these analyses, six are penitentiaries for women (Nova  
256 Institution for Women in Nova Scotia, Joliette Institution in Quebec, Grand Valley Institution for  
257 Women in Ontario, Edmonton Institution for Women in Alberta, Fraser Valley Institution in  
258 British Columbia, and Okimaw Ohci Healing Lodge in Saskatchewan). Together they hold up to  
259 785 women (5% of the total capacity of 16,401 federal prisoners in Canada).

260

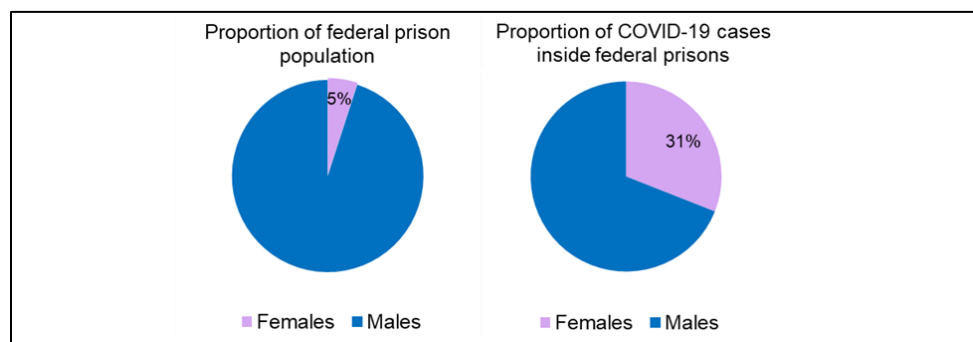

261

262 Figure 5: Distribution of women among federal prisons and prison COVID-19 cases (Canada, April 21, 2020).

263 At the time of data collection, there were 59 cases of COVID-19 in women’s penitentiaries.  
264 These represented 31% of all cases in federal penitentiaries (N=189) (Figure 5), suggesting that  
265 women, and women’s penitentiaries, are over-represented among COVID-19 cases inside federal  
266 prisons. COVID-19 prevalence was 8 times higher among women’s prisons (8% prevalence)  
267 than prisons for men (1% prevalence) and 80 times higher than in the general Canadian  
268 population (0.1%).

269

## 270 **4. DISCUSSION**

271

### 272 *Key findings*

273

274 The data suggest that at least five federal penitentiaries, one in British Columbia, three in Quebec  
275 and one in Ontario, are experiencing COVID-19 outbreaks. Each of these penitentiaries is  
276 reporting high levels of testing, compared to provincial and national rates, and this testing  
277 appears to be a reaction to the emergence of outbreaks that have already begun, rather than a  
278 proactive prevention effort. Though at least thirteen (26%) of facilities appear to be experiencing  
279 very low if any COVID-19 cases, these are also facilities that have reported low levels of testing  
280 per 1000 population, so it is unclear whether the low case counts reflect true case prevalence. We  
281 observed lower levels of testing than the Canadian general population average in 26  
282 penitentiaries (72%) and a total absence of testing in 12 penitentiaries (24%). Our study also  
283 suggests a smaller proportion of cases inside prisons have recovered compared to cases in the  
284 general population. This may indicate that the spread of COVID-19 is lagging in penitentiaries,  
285 and the worst is yet to come. It may also indicate that prisoners face suboptimal conditions for  
286 recovery. We also found that at least three of the current penitentiary outbreaks are in proximity  
287 to city centers (e.g. Montreal and Vancouver), and higher COVID-19 prevalence has been  
288 observed in women’s (8% prevalence) compared to men’s prisons (1% prevalence), overall.

289

### 290 *Strengths and limitations*

291

292 The primary strength of this study is its use of the best available data on COVID-19 testing and  
293 case incidence in Canadian Federal penitentiaries and the general Canadian population to give an

294 early situational report on testing and infection-related outcomes within these facilities. This  
295 study is a baseline assessment from which future analyses using updated data can be based. A  
296 limitation of this study is our use of the maximum potential capacity of each penitentiary as the  
297 population denominator for rate calculations, rather than the ‘true’ population at the time of data  
298 collection. We expect that these denominators are likely too large, given that prisons may not be  
299 at their full capacity and pressures to release non-violent offenders to reduce the number of  
300 susceptible individuals within prisons [17]. This may have led to the under-estimation of testing  
301 and infection prevalence estimates. Further, this study was not able to also count the number of  
302 tests and cases identified within custodial and health staff within these same penitentiaries, which  
303 is an important contributing factor to disease transmission. While other deaths in federal  
304 penitentiaries were recorded by CSC during the study period (e.g. [18]), only one case was  
305 reported as COVID-19 related. It is unclear whether other deaths occurring within CSC facilities  
306 have or will be tested for COVID-19 post-mortem. Lastly, these findings may not be  
307 generalizable to provincial, remand, or immigration detention facilities, which may see far more  
308 movement in and out given the shorter duration of sentences.

309

### 310 *Implications*

311

312 These early findings have several implications for public health and emergency outbreak  
313 response inside federal penitentiaries. The observation that at least five Canadian penitentiaries  
314 are experiencing outbreaks highlights the importance that all penitentiary populations and  
315 custodial and health care staff uphold rigorous prevention control practices (and be given the  
316 resources to do so), including regular hand hygiene and cleaning practices, the use of personal  
317 protection equipment, and physical distancing measures [19]. Scholars and legal experts have  
318 also emphasized the need to consider the release of prisoners to reduce the proportion of  
319 susceptible individuals within prisons [20].

320

321 Our findings of sparse testing across several penitentiaries in Canada suggests that a more  
322 proactive testing approach may be needed to help curb potential future outbreaks. This is  
323 especially the case given studies suggesting that up to 60% of COVID-19 cases may be  
324 asymptomatic [21-23]. Testing based on symptom-presence alone may thus need to be

325 reconsidered within the confined spaces of prisons, as many cases may go undetected as long as  
326 testing is not expanded.

327  
328 Relevant testing strategies could include universal testing or, active, sentinel-based testing.  
329 While universal testing [19] [24] is time and resource-intensive but is much more feasible within  
330 small confined populations than in the general public. In the context of COVID-19, this strategy  
331 has been used navy ships [21] and homeless shelters [25, 26] to identify all cases and adapt  
332 outbreak control interventions accordingly. In Canadian penitentiaries, universal testing may be  
333 most pertinent in prisons that have already reported confirmed cases. At the time of writing,  
334 British Columbia's Mission Institution penitentiary — where one of the five outbreaks is  
335 unfolding — had reported planning universal testing of all inmates and staff [27]. However, none  
336 of the other institutions had indicated plans to use such an approach.

337  
338 As an alternative to universal testing, active sentinel surveillance involves identifying a subset of  
339 prisons in which regular testing for COVID-19 among prisoners and staff, regardless of symptom  
340 presence, could be conducted. Test results would be used for monitoring in the months to come  
341 until a vaccine or effective treatment is identified. This approach may be most relevant in  
342 provinces with low numbers of new daily COVID-19 cases (e.g. currently New Brunswick, Nova  
343 Scotia, Saskatchewan and Manitoba currently) or in later in the pandemic, when community  
344 transmission subsides and testing all prisoners may be too costly and inefficient.

345  
346 These types of proactive surveillance activities may be particularly important in the context of  
347 alternative options to reduce the spread of COVID-19, such as long-term cell-based confinement  
348 for the entire prison population. Confinement has been associated with severe mental health risk  
349 [28]—particularly for Indigenous and racialized populations [6]—and has come under  
350 considerable scrutiny in Canada in recent years [29].

351  
352 Lastly, studies on the effectiveness of universal and sentinel-based testing strategies are  
353 warranted, as are mathematical models that explore the epidemiologic consequence of  
354 interventions (or lack thereof) within federal prisons on COVID-19 transmission, morbidity and  
355 death, as has been done in other country settings [30].



356

## 357 **5. CONCLUSION**

358

359 Gaps in COVID-19 testing in several jurisdictions and recorded outbreaks in several  
360 penitentiaries in Canada suggest that federal prisons represent an emerging battleground against  
361 the COVID-19 pandemic. With an ageing population that is particularly at high risk due to the  
362 prevalence of underlying chronic and infectious health conditions, prisoners represent a  
363 potentially neglected segment of society that is at high risk of bearing a high burden of COVID-  
364 19 related morbidity and mortality. As indigenous and racialized communities are over-  
365 represented within the Canadian prison system, COVID-19 prevention inside penitentiaries  
366 represents a pressing public health and health equity issue.

367

368

## 369 **AUTHOR CONTRIBUTIONS**

370

371 AB and AP conceptualized the study, with input from AS. AB and AP analyzed the data. AB  
372 and AP drafted the manuscript. AS responded to drafts of the manuscript.

373

## 374 **FUNDING**

375

376 AB receives postdoctoral funding from the Fonds de Recherche du Québec-Santé. AS is  
377 supported by the Canada Research Chair in Population Health Equity.

378

## 379 **CONFLICT OF INTEREST**

380

381 None

382

## 383 **ETHICS COMMITTEE APPROVAL**

384

385 None required

386

387

## 388 **REFERENCES**

389

- 390 1. Young, L.C., et al., *Summer outbreak of respiratory disease in an Australian prison due*  
391 *to an influenza A/Fujian/411/2002(H3N2)-like virus*. *Epidemiol Infect*, 2005. **133**(1): p.  
392 107-12.

- 393 2. Parcell, B.J., et al., *Prison and community outbreak of severe respiratory infection due to*  
394 *adenovirus type 14p1 in Tayside, UK*. J Public Health (Oxf), 2015. **37**(1): p. 64-9.
- 395 3. Dolan, K., et al., *Global burden of HIV, viral hepatitis, and tuberculosis in prisoners and*  
396 *detainees*. The Lancet, 2016. **388**(10049): p. 1089-1102.
- 397 4. Williams, T., B. Weiser, and W.K. Rashbaum, '*Jails Are Petri Dishes*': *Inmates Freed as*  
398 *the Virus Spreads Behind Bars*, in *The New York Times*. 2020: New York, USA.
- 399 5. Owusu-Bempah, A. and S. Wortley, *Race, crime, and criminal justice in Canada*, in *The*  
400 *Oxford handbook of ethnicity, crime, immigration*. 2014, Oxford UP: Oxford. p. 321-359.
- 401 6. Zinger, I., *Annual Report of the Office of the Correctional Investigator 2014-2015*. 2015,  
402 Office of the Correctional Investigator: Ottawa, Canada.
- 403 7. Zinger, I. and M. Landry, *Aging and dying in prison: an investigation into the*  
404 *experiences of older individuals in federal custody*. 2019, Office of the Correctional  
405 Investigator: Ottawa, Canada.
- 406 8. Zinger, I., *Annual Report of the Office of the Correctional Investigator 2018-2019*. 2018,  
407 Office of the Correctional Investigator: Ottawa, Canada.
- 408 9. Davis, D., *Correctional Service of Canada takes steps to reduce risk of coronavirus*  
409 *entering prisons*, in *Global News*. 2020.
- 410 10. CSC. *Correctional Service of Canada: Inmate COVID-19 testing in federal correctional*  
411 *institutions, April 21, 2020*. 2020 [cited 2020 April 21, 2020]; Available from:  
412 <https://www.csc-scc.gc.ca/001/006/001006-1014-en.shtml>.
- 413 11. EsriCanada. *COVID-19 Canadian Outbreak Tracker*. 2020 [cited 2020 April 22];  
414 Available from: [https://resources-](https://resources-covid19canada.hub.arcgis.com/app/eb0ec6ffdb654e71ab3c758726c55b68)  
415 [covid19canada.hub.arcgis.com/app/eb0ec6ffdb654e71ab3c758726c55b68](https://resources-covid19canada.hub.arcgis.com/app/eb0ec6ffdb654e71ab3c758726c55b68).
- 416 12. CSC. *Facilities and Security: Institutional profiles*. 2013 [cited 2020 April 21];  
417 Available from: <https://www.csc-scc.gc.ca/institutions/index-eng.shtml>.
- 418 13. StatisticsCanada. *Population estimates, quarterly: Table: 17-10-0009-01 (formerly*  
419 *CANSIM 051-0005)*. 2020 [cited 2020 April 21]; Available from:  
420 <https://www150.statcan.gc.ca/t1/tbl1/en/tv.action?pid=1710000901>.
- 421 14. HealthLinkBC. *Coronavirus disease (COVID-19)*. 2020 [cited 2020 April 24]; Available  
422 from: <https://www.healthlinkbc.ca/health-feature/coronavirus-disease-covid-19>.
- 423 15. INSPQ, *COVID-19 : Recommandations pour la levée des mesures d'isolement des*  
424 *travailleurs de la santé*. 2020, Institut National de Santé Publique du Québec, Comité sur  
425 les infections nosocomiales du Québec: Quebec, Canada.
- 426 16. PHAC. *Infection Prevention and Control for COVID-19: Interim Guidance for Long*  
427 *Term Care Homes*. 2020 [cited 2020 April 29]; Available from:  
428 [https://www.canada.ca/en/public-health/services/diseases/2019-novel-coronavirus-](https://www.canada.ca/en/public-health/services/diseases/2019-novel-coronavirus-infection/prevent-control-covid-19-long-term-care-homes.html)  
429 [infection/prevent-control-covid-19-long-term-care-homes.html](https://www.canada.ca/en/public-health/services/diseases/2019-novel-coronavirus-infection/prevent-control-covid-19-long-term-care-homes.html).
- 430 17. Harris, K., *Bill Blair asks prison, parole heads to consider releasing some inmates to stop*  
431 *spread of COVID-19*, in *CBC News*. 2020: Ottawa.
- 432 18. CSC. *Death of an inmate from Dorchester Penitentiary*. 2020 [cited 2020 April 29];  
433 Available from: [https://www.canada.ca/en/correctional-service/news/2020/04/death-of-](https://www.canada.ca/en/correctional-service/news/2020/04/death-of-an-inmate-from-dorchester-penitentiary.html)  
434 [an-inmate-from-dorchester-penitentiary.html](https://www.canada.ca/en/correctional-service/news/2020/04/death-of-an-inmate-from-dorchester-penitentiary.html).
- 435 19. World Health, O., *Preparedness, prevention and control of COVID-19 in prisons and*  
436 *other places of detention (2020), Interim guidance 15 March 2020*. 2020.
- 437 20. Kinner, S.A., et al., *Prisons and custodial settings are part of a comprehensive response*  
438 *to COVID-19*. Lancet Public Health, 2020. **5**(4): p. e188-e189.

- 439 21. Stewart, P. and I. Ali, *Coronavirus clue? Most cases aboard U.S. aircraft carrier are*  
440 *symptom-free*, in *Reuters*. 2020: Washington, USA.
- 441 22. Nishiura, H., et al., *Estimation of the asymptomatic ratio of novel coronavirus infections*  
442 *(COVID-19)*. medRxiv, 2020: p. 2020.02.03.20020248.
- 443 23. Kimball, A., et al., *Asymptomatic and Presymptomatic SARS-CoV-2 Infections in*  
444 *Residents of a Long-Term Care Skilled Nursing Facility - King County, Washington,*  
445 *March 2020*. MMWR Morb Mortal Wkly Rep, 2020. **69**(13): p. 377-381.
- 446 24. ECDC, *Strategies for the surveillance of COVID-19*, in *Technical Report: 9 April 2020*.  
447 2020, European Centre for Disease Prevention and Control.
- 448 25. Mosites, E., *Assessment of SARS-CoV-2 Infection Prevalence in Homeless Shelters—*  
449 *Four US Cities, March 27–April 15, 2020*. MMWR. Morbidity and Mortality Weekly  
450 Report, 2020. **69**.
- 451 26. Karedes, D., *CDC reviewing ‘stunning’ universal testing results from Boston homeless*  
452 *shelter*, in *Boston 25 News*. 2020, Boston 25 News: Boston, USA.
- 453 27. Lovgreen, T., *All inmates and staff at Mission Institution being tested for COVID-19*, in  
454 *CBC News*. 2020: British Columbia, Canada.
- 455 28. Arrigo, B.A. and J.L. Bullock, *The Psychological Effects of Solitary Confinement on*  
456 *Prisoners in Supermax Units: Reviewing What We Know and Recommending What*  
457 *Should Change*. International Journal of Offender Therapy and Comparative  
458 Criminology, 2007. **52**(6): p. 622-640.
- 459 29. Senate, *Proceedings of the Standing Senate Committee on Social Affairs, Science and*  
460 *Technology Issue No. 60 - Evidence - May 15, 2019*, in *Issue No. 60 - Evidence - May 15,*  
461 *2019*. 2019, Canadian Senate: Ottawa, Canada.
- 462 30. Lofgren, E., et al., *The Epidemiological Implications of Incarceration Dynamics in Jails*  
463 *for Community, Corrections Officer, and Incarcerated Population Risks from COVID-19*.  
464 medRxiv, 2020: p. 2020.04.08.20058842.  
465  
466  
467

468 **7. SUPPLEMENTARY FILE**

469

470 **Federal Prison Population Data – as of April 21, 2020**

471

| Province                                              | Federal penitentiary                             | Population                                   | Cases | Total tests | Deaths | Recovered |   |
|-------------------------------------------------------|--------------------------------------------------|----------------------------------------------|-------|-------------|--------|-----------|---|
| NB                                                    | Atlantic Institution                             | 331                                          | 0     | 1           | 0      | 0         |   |
|                                                       | Dorchester Medium Institution                    | 397                                          | 0     | 4           | 0      | 0         |   |
|                                                       | Dorchester Minimum Institution                   | 302                                          | 0     | 1           | 0      | 0         |   |
| NS                                                    | Nova Institution for Women                       | 99                                           | 0     | 3           | 0      | 0         |   |
|                                                       | Springhill Institution                           | 636                                          | 0     | 4           | 0      | 0         |   |
| QC                                                    | Federal Training Centre Multi-Level Unit-Minimum | 764                                          | 51    | 76          | 0      | 0         |   |
|                                                       | Regional Reception Centre                        | 599                                          | 0     | 5           | 0      | 0         |   |
|                                                       | Archambault Institution Medium                   | 284                                          | 0     | 1           | 0      | 0         |   |
|                                                       | Archambault Institution Minimum                  | 215                                          | 0     | 1           | 0      | 0         |   |
|                                                       | Cowansville Institution                          | 599                                          | 0     | 1           | 0      | 0         |   |
|                                                       | Donnacona Institution                            | 451                                          | 0     | 5           | 0      | 0         |   |
|                                                       | Drummond Institution                             | 369                                          | 0     | 4           | 0      | 0         |   |
|                                                       | Joliette Institution                             | 132                                          | 51    | 76          | 0      | 16        |   |
|                                                       | La Macaza Institution                            | 240                                          | 0     | 1           | 0      | 0         |   |
|                                                       | Port-Cartier Institution                         | 237                                          | 15    | 21          | 0      | 3         |   |
|                                                       | ONT                                              | Bath Institution & Regional Treatment Center | 516   | 0           | 11     | 0         | 0 |
|                                                       |                                                  | Beaver Creek Medium Institution              | 516   | 0           | 2      | 0         | 0 |
|                                                       |                                                  | Beaver Creek Minimum Institution             | 201   | 0           | 1      | 0         | 0 |
| Collins Bay Maximum Institution                       |                                                  | 96                                           | 0     | 0           | 0      | 0         |   |
| Collins Bay Medium Institution                        |                                                  | 482                                          | 0     | 0           | 0      | 0         |   |
| Collins Bay Minimum Inst. & Regional Treatment Ctr    |                                                  | 182                                          | 0     | 1           | 0      | 0         |   |
| Grand Valley Institution for Women                    |                                                  | 215                                          | 8     | 108         | 0      | 2         |   |
| Joyceville Institution & Minimum Institution          |                                                  | 752                                          | 0     | 6           | 0      | 0         |   |
| Millhaven Institution-Regional Hospital-Treatment Ctr |                                                  | 496                                          | 0     | 5           | 0      | 0         |   |
| Warkworth Institution                                 |                                                  | 537                                          | 0     | 26          | 0      | 0         |   |
| AB                                                    | Bowden Institution                               | 600                                          | 0     | 17          | 0      | 0         |   |
|                                                       | Drumheller Institution                           | 704                                          | 0     | 2           | 0      | 0         |   |
|                                                       | Edmonton Institution                             | 324                                          | 0     | 5           | 0      | 0         |   |
|                                                       | Edmonton Institution for Women                   | 167                                          | 0     | 0           | 0      | 0         |   |
|                                                       | Grande Cache Institution                         | 243                                          | 0     | 2           | 0      | 0         |   |
|                                                       | Grierson Centre                                  | 30                                           | 0     | 0           | 0      | 0         |   |
|                                                       | Pê Sâkâstêw Centre                               | 60                                           | 0     | 1           | 0      | 0         |   |
| SASK                                                  | Okimaw Ohci Healing Lodge                        | 60                                           | 0     | 2           | 0      | 0         |   |
|                                                       | Regional Psychiatric Centre                      | 204                                          | 0     | 11          | 0      | 0         |   |
|                                                       | Saskatchewan Maximum Penitentiary                | 176                                          | 0     | 0           | 0      | 0         |   |
|                                                       | Saskatchewan Medium Penitentiary                 | 457                                          | 0     | 7           | 0      | 0         |   |
|                                                       | Saskatchewan Minimum Penitentiary                | 176                                          | 0     | 0           | 0      | 0         |   |
|                                                       | Willow Cree Healing Lodge                        | 80                                           | 0     | 0           | 0      | 0         |   |
| MAN                                                   | Stony Mountain Maximum Institution               | 96                                           | 0     | 0           | 0      | 0         |   |
|                                                       | Stony Mountain Medium Institution                | 484                                          | 0     | 12          | 0      | 0         |   |
|                                                       | Stony Mountain Minimum Institution               | 217                                          | 0     | 0           | 0      | 0         |   |
| BC                                                    | Fraser Valley Institution                        | 112                                          | 0     | 3           | 0      | 0         |   |

|                                                                                                                                                      |                                                      |       |     |     |   |    |
|------------------------------------------------------------------------------------------------------------------------------------------------------|------------------------------------------------------|-------|-----|-----|---|----|
|                                                                                                                                                      | Kent Institution                                     | 378   | 0   | 0   | 0 | 0  |
|                                                                                                                                                      | Kwìkwèxwelhp Healing Lodge                           | 50    | 0   | 0   | 0 | 0  |
|                                                                                                                                                      | Matsqui Institution                                  | 446   | 0   | 0   | 0 | 0  |
|                                                                                                                                                      | Mission Medium Institution                           | 216   | 64  | 105 | 1 | 21 |
|                                                                                                                                                      | Mission Minimum Institution                          | 324   | 0   | 2   | 0 | 0  |
|                                                                                                                                                      | Mountain Institution                                 | 440   | 0   | 4   | 0 | 0  |
|                                                                                                                                                      | Pacific Institution-Regional Treatment-Reception Ctr | 509   | 0   | 21  | 0 | 0  |
|                                                                                                                                                      | William Head Institution                             | 200   | 0   | 3   | 0 | 0  |
| Canada                                                                                                                                               | Overall                                              | 16401 | 189 | 564 | 1 | 42 |
| Accessed April 21, 2020: <a href="https://www.csc-scc.gc.ca/001/006/001006-1014-en.shtml">https://www.csc-scc.gc.ca/001/006/001006-1014-en.shtml</a> |                                                      |       |     |     |   |    |

472

473

### General Population Data – as of April 21, 2020

474

| Province                                                                                                                                                                                                                                                                                                                                                                               | Population | Positive tests | Total tests | Deaths | Recovered |
|----------------------------------------------------------------------------------------------------------------------------------------------------------------------------------------------------------------------------------------------------------------------------------------------------------------------------------------------------------------------------------------|------------|----------------|-------------|--------|-----------|
| New Brunswick                                                                                                                                                                                                                                                                                                                                                                          | 779,993    | 118            | 11281       | 0      | 102       |
| Nova Scotia                                                                                                                                                                                                                                                                                                                                                                            | 977,457    | 772            | 22927       | 12     | 330       |
| Quebec                                                                                                                                                                                                                                                                                                                                                                                 | 8,537,674  | 20965          | 174490      | 1134   | 4291      |
| Ontario                                                                                                                                                                                                                                                                                                                                                                                | 14,711,827 | 12245          | 174170      | 659    | 6221      |
| Alberta                                                                                                                                                                                                                                                                                                                                                                                | 4,413,146  | 3095           | 109015      | 61     | 1273      |
| Saskatchewan                                                                                                                                                                                                                                                                                                                                                                           | 1,181,666  | 320            | 24811       | 4      | 252       |
| Manitoba                                                                                                                                                                                                                                                                                                                                                                               | 1,377,517  | 255            | 20319       | 6      | 150       |
| British Columbia                                                                                                                                                                                                                                                                                                                                                                       | 5,110,917  | 1724           | 65545       | 87     | 1041      |
| Canada (Overall)                                                                                                                                                                                                                                                                                                                                                                       | 37,894,799 | 39805          | 614340      | 1966   | 13908     |
| Accessed April 21, 2020: <a href="http://openhub-esrica-apps.opendata.arcgis.com/datasets/covid-19-canada-1">http://openhub-esrica-apps.opendata.arcgis.com/datasets/covid-19-canada-1</a> ; Population data, accessed April 21, 2020: <a href="https://www150.statcan.gc.ca/t1/tb11/en/tv.action?pid=1710000901">https://www150.statcan.gc.ca/t1/tb11/en/tv.action?pid=1710000901</a> |            |                |             |        |           |

475

476

**Data on facilities with one or more cases as of April 21, 2020**

Data were available for March 30 and April 7-8, 10, 12, 13, 15, 17-18, 21 of 2020.

**Port Cartier Institution, Quebec** (Maximum Population Estimate: 237 prisoners)

| Date<br>(2020) | Cumulative test totals (N) |          |         |              |       | Population categories |                            |           |        |
|----------------|----------------------------|----------|---------|--------------|-------|-----------------------|----------------------------|-----------|--------|
|                | Positive<br>(Cases)        | Negative | Pending | Inconclusive | Total | Susceptible           | Infected<br>(Active Cases) | Recovered | Deaths |
| 30-03          | 2                          | 0        | 3       | 0            | 5     | 235                   | 2                          | 0         | 0      |
| 31-03          | 2                          | 0        | 3       | 0            | 5     | 235                   | 2                          | 0         | 0      |
| 01-04          | 2                          | 0        | 3       | 0            | 5     | 235                   | 2                          | 0         | 0      |
| 02-04          | 2                          | 0        | 3       | 0            | 5     | 235                   | 2                          | 0         | 0      |
| 03-04          | 2                          | 0        | 3       | 0            | 5     | 235                   | 2                          | 0         | 0      |
| 04-04          | 2                          | 0        | 3       | 0            | 5     | 235                   | 2                          | 0         | 0      |
| 05-04          | 2                          | 0        | 3       | 0            | 5     | 235                   | 2                          | 0         | 0      |
| 06-04          | 2                          | 0        | 3       | 0            | 5     | 235                   | 2                          | 0         | 0      |
| 07-04          | 7                          | 3        | 4       | 0            | 14    | 230                   | 7                          | 0         | 0      |
| 08-04          | 9                          | 4        | 1       | 0            | 14    | 228                   | 9                          | 0         | 0      |
| 09-04          | 9                          | 4        | 1       | 0            | 14    | 228                   | 9                          | 0         | 0      |
| 10-04          | 10                         | 4        | 0       | 0            | 14    | 227                   | 10                         | 0         | 0      |
| 11-04          | 10                         | 4        | 0       | 0            | 14    | 227                   | 10                         | 0         | 0      |
| 12-04          | 10                         | 4        | 1       | 0            | 15    | 227                   | 10                         | 0         | 0      |
| 13-04          | 10                         | 4        | 1       | 0            | 15    | 227                   | 10                         | 0         | 0      |
| 14-04          | 10                         | 4        | 1       | 0            | 15    | 227                   | 10                         | 0         | 0      |
| 15-04          | 10                         | 5        | 4       | 0            | 19    | 227                   | 10                         | 0         | 0      |
| 16-04          | 10                         | 5        | 4       | 0            | 19    | 227                   | 10                         | 0         | 0      |
| 17-04          | 14                         | 5        | 0       | 0            | 19    | 223                   | 12                         | 2         | 0      |
| 18-04          | 14                         | 5        | 0       | 0            | 19    | 223                   | 12                         | 2         | 0      |
| 19-04          | 14                         | 5        | 0       | 0            | 19    | 223                   | 12                         | 2         | 0      |
| 20-04          | 14                         | 5        | 0       | 0            | 19    | 223                   | 12                         | 2         | 0      |
| 21-04          | 15                         | 5        | 1       | 0            | 21    | 222                   | 12                         | 3         | 0      |

**Federal Training Center, Quebec (Maximum Population Estimate: 764)**

| Date<br>(2020) | Cumulative test totals (N) |          |         |              |                | Population categories |                         |           |        |
|----------------|----------------------------|----------|---------|--------------|----------------|-----------------------|-------------------------|-----------|--------|
|                | Positive<br>(Cases)        | Negative | Pending | Inconclusive | Total<br>tests | Susceptible           | Infected (Active Cases) | Recovered | Deaths |
| 30-03          | 0                          | 1        | 0       | 0            | 1              | 764                   | 0                       | 0         | 0      |
| 31-03          | 0                          | 1        | 0       | 0            | 1              | 764                   | 0                       | 0         | 0      |
| 01-04          | 0                          | 1        | 0       | 0            | 1              | 764                   | 0                       | 0         | 0      |
| 02-04          | 0                          | 1        | 0       | 0            | 1              | 764                   | 0                       | 0         | 0      |
| 03-04          | 0                          | 1        | 0       | 0            | 1              | 764                   | 0                       | 0         | 0      |
| 04-04          | 0                          | 1        | 0       | 0            | 1              | 764                   | 0                       | 0         | 0      |
| 05-04          | 0                          | 1        | 0       | 0            | 1              | 764                   | 0                       | 0         | 0      |
| 06-04          | 0                          | 1        | 0       | 0            | 1              | 764                   | 0                       | 0         | 0      |
| 07-04          | 0                          | 4        | 0       | 0            | 4              | 764                   | 0                       | 0         | 0      |
| 08-04          | 0                          | 4        | 0       | 0            | 4              | 764                   | 0                       | 0         | 0      |
| 09-04          | 0                          | 4        | 0       | 0            | 4              | 764                   | 0                       | 0         | 0      |
| 10-04          | 1                          | 4        | 1       | 0            | 6              | 763                   | 1                       | 0         | 0      |
| 11-04          | 1                          | 4        | 1       | 0            | 6              | 763                   | 1                       | 0         | 0      |
| 12-04          | 5                          | 4        | 3       | 0            | 12             | 759                   | 5                       | 0         | 0      |
| 13-04          | 5                          | 5        | 2       | 0            | 12             | 759                   | 5                       | 0         | 0      |
| 14-04          | 5                          | 5        | 2       | 0            | 12             | 759                   | 5                       | 0         | 0      |
| 15-04          | 25                         | 9        | 15      | 0            | 49             | 739                   | 25                      | 0         | 0      |
| 16-04          | 25                         | 9        | 15      | 0            | 49             | 739                   | 25                      | 0         | 0      |
| 17-04          | 37                         | 12       | 10      | 0            | 59             | 727                   | 37                      | 0         | 0      |
| 18-04          | 37                         | 12       | 10      | 0            | 59             | 727                   | 37                      | 0         | 0      |
| 19-04          | 37                         | 12       | 10      | 0            | 59             | 727                   | 37                      | 0         | 0      |
| 20-04          | 37                         | 12       | 10      | 0            | 59             | 727                   | 37                      | 0         | 0      |
| 21-04          | 51                         | 14       | 11      | 0            | 76             | 713                   | 51                      | 0         | 0      |

**Joliette Women’s Institution, Quebec** (Maximum Population Estimate: 132 prisoners)

| Date<br>(2020) | Cumulative test totals (N) |          |         |              |             | Population categories |                         |           |        |
|----------------|----------------------------|----------|---------|--------------|-------------|-----------------------|-------------------------|-----------|--------|
|                | Positive (Cases)           | Negative | Pending | Inconclusive | Total tests | Susceptible           | Infected (Active Cases) | Recovered | Deaths |
| 30-03          | 0                          | 0        | 7       | 0            | 7           | 132                   | 0                       | 0         | 0      |
| 31-03          | 0                          | 0        | 7       | 0            | 7           | 132                   | 0                       | 0         | 0      |
| 01-04          | 0                          | 0        | 7       | 0            | 7           | 132                   | 0                       | 0         | 0      |
| 02-04          | 0                          | 0        | 7       | 0            | 7           | 132                   | 0                       | 0         | 0      |
| 03-04          | 0                          | 0        | 7       | 0            | 7           | 132                   | 0                       | 0         | 0      |
| 04-04          | 0                          | 0        | 7       | 0            | 7           | 132                   | 0                       | 0         | 0      |
| 05-04          | 0                          | 0        | 7       | 0            | 7           | 132                   | 0                       | 0         | 0      |
| 06-04          | 0                          | 0        | 7       | 0            | 7           | 132                   | 0                       | 0         | 0      |
| 07-04          | 10                         | 0        | 6       | 0            | 16          | 122                   | 10                      | 0         | 0      |
| 08-04          | 10                         | 0        | 6       | 0            | 16          | 122                   | 10                      | 0         | 0      |
| 09-04          | 10                         | 0        | 6       | 0            | 16          | 122                   | 10                      | 0         | 0      |
| 10-04          | 16                         | 0        | 0       | 0            | 16          | 116                   | 16                      | 0         | 0      |
| 11-04          | 16                         | 0        | 0       | 0            | 16          | 116                   | 16                      | 0         | 0      |
| 12-04          | 17                         | 0        | 0       | 0            | 17          | 115                   | 17                      | 0         | 0      |
| 13-04          | 17                         | 0        | 0       | 0            | 17          | 115                   | 17                      | 0         | 0      |
| 14-04          | 17                         | 0        | 0       | 0            | 17          | 115                   | 17                      | 0         | 0      |
| 15-04          | 48                         | 17       | 10      | 0            | 75          | 84                    | 48                      | 0         | 0      |
| 16-04          | 48                         | 17       | 10      | 0            | 75          | 84                    | 48                      | 0         | 0      |
| 17-04          | 51                         | 25       | 0       | 0            | 76          | 81                    | 41                      | 10        | 0      |
| 18-04          | 51                         | 25       | 0       | 0            | 76          | 81                    | 41                      | 10        | 0      |
| 19-04          | 51                         | 25       | 0       | 0            | 76          | 81                    | 41                      | 10        | 0      |
| 20-04          | 51                         | 25       | 0       | 0            | 76          | 81                    | 41                      | 10        | 0      |
| 21-04          | 51                         | 25       | 0       | 0            | 76          | 81                    | 35                      | 16        | 0      |



**Mission Medium Security Institution** (Maximum Population Estimate: 216 prisoners)

| Date<br>(2020) | Cumulative test totals (N) |          |         |              |                | Population categories |                         |           |        |
|----------------|----------------------------|----------|---------|--------------|----------------|-----------------------|-------------------------|-----------|--------|
|                | Positive<br>(Cases)        | Negative | Pending | Inconclusive | Total<br>tests | Susceptible           | Infected (Active Cases) | Recovered | Deaths |
| 30-03          | 0                          | 0        | 0       | 0            | 0              | 216                   | 0                       | 0         | 0      |
| 31-03          | 0                          | 0        | 0       | 0            | 0              | 216                   | 0                       | 0         | 0      |
| 01-04          | 0                          | 0        | 0       | 0            | 0              | 216                   | 0                       | 0         | 0      |
| 02-04          | 0                          | 0        | 0       | 0            | 0              | 216                   | 0                       | 0         | 0      |
| 03-04          | 0                          | 0        | 0       | 0            | 0              | 216                   | 0                       | 0         | 0      |
| 04-04          | 0                          | 0        | 0       | 0            | 0              | 216                   | 0                       | 0         | 0      |
| 05-04          | 0                          | 0        | 0       | 0            | 0              | 216                   | 0                       | 0         | 0      |
| 06-04          | 0                          | 0        | 0       | 0            | 0              | 216                   | 0                       | 0         | 0      |
| 07-04          | 11                         | 1        | 17      | 0            | 29             | 205                   | 11                      | 0         | 0      |
| 08-04          | 14                         | 1        | 21      | 0            | 36             | 202                   | 14                      | 0         | 0      |
| 09-04          | 14                         | 1        | 21      | 0            | 36             | 202                   | 14                      | 0         | 0      |
| 10-04          | 25                         | 6        | 15      | 0            | 46             | 191                   | 25                      | 0         | 0      |
| 11-04          | 25                         | 6        | 15      | 0            | 46             | 191                   | 25                      | 0         | 0      |
| 12-04          | 35                         | 6        | 14      | 0            | 55             | 181                   | 35                      | 0         | 0      |
| 13-04          | 41                         | 6        | 16      | 0            | 63             | 175                   | 41                      | 0         | 0      |
| 14-04          | 41                         | 6        | 16      | 0            | 63             | 175                   | 41                      | 0         | 0      |
| 15-04          | 54                         | 10       | 6       | 0            | 70             | 162                   | 54                      | 0         | 0      |
| 16-04          | 54                         | 10       | 6       | 0            | 70             | 162                   | 54                      | 0         | 0      |
| 17-04          | 60                         | 12       | 19      | 2            | 93             | 156                   | 59                      | 0         | 1      |
| 18-04          | 60                         | 23       | 8       | 2            | 93             | 156                   | 44                      | 15        | 1      |
| 19-04          | 60                         | 23       | 8       | 2            | 93             | 156                   | 44                      | 15        | 1      |
| 20-04          | 60                         | 23       | 8       | 2            | 93             | 156                   | 44                      | 15        | 1      |
| 21-04          | 64                         | 27       | 12      | 2            | 105            | 152                   | 42                      | 21        | 1      |

**Grand Valley Institution for Women (Maximum Population Estimate: 112 prisoners)**

| Date<br>(2020) | Cumulative test totals (N) |          |         |              |                | Population categories |                            |           |        |
|----------------|----------------------------|----------|---------|--------------|----------------|-----------------------|----------------------------|-----------|--------|
|                | Positive<br>(Cases)        | Negative | Pending | Inconclusive | Total<br>tests | Susceptible           | Infected<br>(Active Cases) | Recovered | Deaths |
| 30-03          | 1                          | 1        | 0       | 0            | 2              | 214                   | 1                          | 0         | 0      |
| 31-03          | 1                          | 1        | 0       | 0            | 2              | 214                   | 1                          | 0         | 0      |
| 01-04          | 1                          | 1        | 0       | 0            | 2              | 214                   | 1                          | 0         | 0      |
| 02-04          | 1                          | 1        | 0       | 0            | 2              | 214                   | 1                          | 0         | 0      |
| 03-04          | 1                          | 1        | 0       | 0            | 2              | 214                   | 1                          | 0         | 0      |
| 04-04          | 1                          | 1        | 0       | 0            | 2              | 214                   | 1                          | 0         | 0      |
| 05-04          | 1                          | 1        | 0       | 0            | 2              | 214                   | 1                          | 0         | 0      |
| 06-04          | 1                          | 1        | 0       | 0            | 2              | 214                   | 1                          | 0         | 0      |
| 07-04          | 7                          | 24       | 5       | 0            | 36             | 208                   | 7                          | 0         | 0      |
| 08-04          | 8                          | 27       | 1       | 0            | 36             | 207                   | 8                          | 0         | 0      |
| 09-04          | 8                          | 27       | 1       | 0            | 36             | 207                   | 8                          | 0         | 0      |
| 10-04          | 8                          | 40       | 35      | 0            | 83             | 207                   | 8                          | 0         | 0      |
| 11-04          | 8                          | 40       | 35      | 0            | 83             | 207                   | 8                          | 0         | 0      |
| 12-04          | 8                          | 80       | 0       | 0            | 88             | 207                   | 8                          | 0         | 0      |
| 13-04          | 8                          | 80       | 1       | 0            | 89             | 207                   | 8                          | 0         | 0      |
| 14-04          | 8                          | 80       | 1       | 0            | 89             | 207                   | 8                          | 0         | 0      |
| 15-04          | 8                          | 81       | 17      | 0            | 106            | 207                   | 8                          | 0         | 0      |
| 16-04          | 8                          | 81       | 17      | 0            | 106            | 207                   | 8                          | 0         | 0      |
| 17-04          | 8                          | 99       | 1       | 0            | 108            | 207                   | 6                          | 2         | 0      |
| 18-04          | 8                          | 99       | 1       | 0            | 108            | 207                   | 6                          | 2         | 0      |
| 19-04          | 8                          | 99       | 1       | 0            | 108            | 207                   | 6                          | 2         | 0      |
| 20-04          | 8                          | 99       | 1       | 0            | 108            | 207                   | 6                          | 2         | 0      |
| 21-04          | 8                          | 100      | 0       | 0            | 108            | 207                   | 6                          | 2         | 0      |
